# Supplementary material
Source: publisher figshare collection journal article supplement (https://gsajournals.figshare.com/ndownloader/files/17449442)
Supplement: Supplementary file 1 [file 17449442]

generation	run_id	plate_id	treatment	distance_cm
p	1	2	1	342.652
p	1	2	1	314.108
p	1	2	1	243.718
p	1	2	1	369.866
p	1	2	1	235.432
p	1	2	1	269.634
p	1	2	1	443.99
p	1	2	1	527.463
p	1	2	1	326.525
p	1	2	1	185.057
p	1	2	1	367.957
p	1	2	1	440.962
p	1	2	1	158.796
p	1	2	1	316.056
p	1	2	1	302.182
p	1	2	1	356.784
p	1	2	1	238.011
p	1	2	1	239.677
p	1	2	1	369.793
p	1	2	1	467.449
p	1	2	1	412.171
p	1	2	1	339.262
p	1	2	1	268.079
p	1	2	1	382.998
p	1	2	1	293.885
p	1	2	1	462.735
p	1	2	1	359.512
p	1	2	1	291.775
p	1	2	1	381.826
p	1	2	1	406.717
p	1	2	1	305.244
p	1	2	1	374.793
p	1	2	1	237.306
p	1	2	1	312.083
p	1	2	1	465.651
p	2	2	1	248.535
p	2	2	1	408.611
p	2	2	1	349.209
p	2	2	1	220.543
p	2	2	1	216.084
p	2	2	1	222.816
p	2	2	1	93.4132
p	2	2	1	134.888
p	2	2	1	244.181
p	2	2	1	274.197
p	2	2	1	169.722
p	2	2	1	253.976
p	2	2	1	210.167
p	2	2	1	253.896
p	2	2	1	337.373
p	2	2	1	87.8058
p	2	2	1	402.873
p	2	2	1	392.116
p	2	2	1	268.46
p	2	2	1	274.364
p	2	2	1	132.695
p	2	2	1	441.629
p	2	2	1	411.119
p	2	2	1	297.915
p	2	2	1	335.433
p	2	2	1	444.304
p	2	2	1	423.026
p	2	2	1	205.701
p	2	2	1	444.842
p	2	2	1	389.107
p	2	2	1	538.7
p	2	2	1	498.716
p	2	2	1	341.453
p	2	2	1	387.698
p	1	1	0	388.711
p	1	1	0	163.835
p	1	1	0	299.051
p	1	1	0	274.673
p	1	1	0	80.9911
p	1	1	0	50.5552
p	1	1	0	182.066
p	1	1	0	326.594
p	1	1	0	169.013
p	1	1	0	428.834
p	1	1	0	297.83
p	1	1	0	197.036
p	1	1	0	305.669
p	1	1	0	415.814
p	1	1	0	369.082
p	1	1	0	269.978
p	1	1	0	382.583
p	1	1	0	237.689
p	1	1	0	46.8299
p	1	1	0	324.736
p	1	1	0	177.24
p	1	1	0	209.77
p	1	1	0	343.966
p	1	1	0	476.035
p	1	1	0	167.457
p	1	1	0	420.703
p	1	1	0	305.215
p	1	1	0	352.917
p	1	1	0	457.116
p	1	1	0	245.205
p	1	1	0	243.715
p	1	1	0	356.551
p	1	1	0	336.514
p	1	1	0	494.414
p	1	1	0	369.392
p	1	1	0	433.121
p	2	1	0	164.456
p	2	1	0	360.769
p	2	1	0	106.903
p	2	1	0	241.965
p	2	1	0	330.535
p	2	1	0	192.27
p	2	1	0	271.798
p	2	1	0	21.3781
p	2	1	0	24.0159
p	2	1	0	18.3892
p	2	1	0	331.367
p	2	1	0	214.526
p	2	1	0	493.76
p	2	1	0	129.676
p	2	1	0	299.574
p	2	1	0	110.427
p	2	1	0	362.892
p	2	1	0	157.834
p	2	1	0	88.8289
p	2	1	0	359.071
p	2	1	0	416.457
p	2	1	0	293.473
p	2	1	0	316.886
p	2	1	0	247.59
p	2	1	0	148.442
p	2	1	0	278.296
p	2	1	0	397.691
p	2	1	0	280.924
p	2	1	0	268.005
p	2	1	0	335.075
p	2	1	0	445.261
p	2	1	0	227.87
p	2	1	0	349.91
p	2	1	0	155.648
p	2	1	0	168.875
p	2	1	0	190.02
F1	1	1	1	451.044
F1	1	1	1	504.173
F1	1	1	1	356.644
F1	1	1	1	263.387
F1	1	1	1	489.763
F1	1	1	1	568.511
F1	1	1	1	298.485
F1	1	1	1	514.977
F1	1	2	1	710.6329914
F1	1	2	1	568.2423096
F1	1	2	1	758.3593664
F1	1	2	1	690.3839204
F1	1	2	1	602.7434726
F1	1	2	1	489.9519796
F1	1	2	1	352.6415986
F1	1	2	1	655.1564277
F1	1	3	1	366.0011099
F1	1	3	1	215.4833042
F1	1	3	1	607.246708
F1	1	3	1	489.2039761
F1	1	3	1	202.5522665
F1	1	3	1	515.8675939
F1	1	3	1	375.4068965
F1	1	4	1	448.963515
F1	1	4	1	476.575765
F1	1	4	1	521.6634702
F1	1	4	1	163.2949826
F1	1	4	1	474.0931163
F1	1	4	1	341.1631545
F1	1	4	1	458.3115947
F1	1	4	1	335.910208
F1	1	5	1	629.901346
F1	1	5	1	539.0068341
F1	1	5	1	184.9246724
F1	1	5	1	446.8216595
F1	1	5	1	332.2763728
F1	1	5	1	489.3008047
F1	1	5	1	409.8423096
F1	1	5	1	448.8248756
F1	1	5	1	324.7599169
F1	1	6	1	594.4399119
F1	1	6	1	563.5928002
F1	1	6	1	436.0406159
F1	1	6	1	425.3921662
F1	1	6	1	321.1412467
F1	1	6	1	358.4920341
F1	1	6	1	458.92056
F1	1	6	1	394.6646074
F1	1	6	1	518.6021728
F1	1	7	1	733.0035172
F1	1	7	1	140.437192
F1	1	7	1	452.8206114
F1	1	7	1	574.9875253
F1	1	7	1	422.9141785
F1	1	7	1	528.2954587
F1	1	7	1	509.2889597
F1	1	7	1	539.1394642
F1	1	7	1	387.9945286
F1	1	8	1	289.6703584
F1	1	8	1	557.8319258
F1	1	8	1	545.928503
F1	1	8	1	247.9659506
F1	1	8	1	670.2947193
F1	1	1	0	69.5847
F1	1	1	0	385.683
F1	1	1	0	539.814
F1	1	1	0	389.322
F1	1	1	0	462.887
F1	1	1	0	432.675
F1	1	1	0	308.748
F1	1	1	0	412.324
F1	1	2	0	76.59061828
F1	1	2	0	533.9875978
F1	1	2	0	413.0411751
F1	1	2	0	352.7187398
F1	1	2	0	339.498537
F1	1	2	0	239.7238745
F1	1	2	0	188.7104817
F1	1	2	0	465.1976606
F1	1	2	0	544.9326354
F1	1	3	0	349.1840722
F1	1	3	0	305.0082349
F1	1	3	0	461.8320185
F1	1	3	0	259.8400641
F1	1	3	0	380.4058451
F1	1	3	0	428.0553979
F1	1	3	0	621.1108682
F1	1	3	0	582.9438571
F1	1	3	0	586.6489344
F1	1	4	0	612.4306746
F1	1	4	0	553.2265134
F1	1	4	0	453.1761822
F1	1	4	0	125.2304515
F1	1	4	0	518.1322941
F1	1	4	0	407.3234748
F1	1	4	0	549.8468944
F1	1	4	0	504.1849221
F1	1	4	0	363.7399991
F1	1	5	0	567.0084248
F1	1	5	0	532.4987085
F1	1	5	0	413.1765217
F1	1	5	0	398.7982489
F1	1	5	0	167.0777434
F1	1	5	0	346.3630055
F1	1	5	0	362.9947673
F1	1	5	0	375.4608322
F1	1	6	0	421.4370277
F1	1	6	0	515.859053
F1	1	6	0	523.1385855
F1	1	6	0	358.124306
F1	1	6	0	589.002318
F1	1	6	0	429.9722775
F1	1	6	0	490.2260951
F1	1	6	0	311.6668886
F1	1	7	0	537.6761743
F1	1	7	0	141.714393
F1	1	7	0	464.3876183
F1	1	7	0	304.5625974
F1	1	7	0	483.8354432
F1	1	7	0	516.101037
F1	1	7	0	531.5779465
F1	1	7	0	283.4359041
F1	1	8	0	189.7063676
F1	1	8	0	241.2860118
F1	1	8	0	238.7876424
F1	1	8	0	523.6880069
F1	1	8	0	248.271987
F1	1	8	0	265.3849831
F1	1	8	0	245.0697339
F1	1	8	0	77.79819546
F1	1	8	0	334.9275699
F1	1	1	F0	592.191
F1	1	1	F0	185.433
F1	1	1	F0	493.367
F1	1	1	F0	380.933
F1	1	1	F0	574.683
F1	1	1	F0	522.426
F1	1	1	F0	539.105
F1	1	2	F0	627.1000635
F1	1	2	F0	401.5220866
F1	1	2	F0	404.1128296
F1	1	2	F0	389.0282134
F1	1	2	F0	279.9805744
F1	1	2	F0	422.4493993
F1	1	2	F0	295.0661924
F1	1	2	F0	587.6608601
F1	1	3	F0	465.7114395
F1	1	3	F0	281.4630663
F1	1	3	F0	476.7027668
F1	1	3	F0	437.9633821
F1	1	3	F0	450.58411
F1	1	3	F0	613.2116741
F1	1	3	F0	593.3397842
F1	1	3	F0	324.4404278
F1	1	4	F0	645.0432761
F1	1	4	F0	501.9961084
F1	1	4	F0	452.622535
F1	1	4	F0	556.1885772
F1	1	4	F0	499.7969848
F1	1	4	F0	306.7586745
F1	1	4	F0	472.8105519
F1	1	5	F0	633.0649177
F1	1	5	F0	462.7160474
F1	1	5	F0	449.5881041
F1	1	5	F0	647.2425586
F1	1	5	F0	618.5604743
F1	1	5	F0	611.4835469
F1	1	5	F0	467.1165042
F1	1	5	F0	272.3029556
F1	1	6	F0	520.5051245
F1	1	6	F0	377.6097733
F1	1	6	F0	417.1496148
F1	1	6	F0	476.646539
F1	1	6	F0	400.5878333
F1	1	6	F0	350.7367636
F1	1	6	F0	523.0816948
F1	1	6	F0	378.5703187
F1	1	7	F0	466.1834279
F1	1	7	F0	173.6128932
F1	1	7	F0	533.5974697
F1	1	7	F0	536.0257785
F1	1	7	F0	380.1747235
F1	1	7	F0	466.6278044
F1	1	8	F0	527.4021753
F1	1	8	F0	614.7741615
F1	1	8	F0	526.272623
F1	1	8	F0	205.9388137
F1	1	8	F0	462.6142806
F1	1	8	F0	236.8081436
F1	1	8	F0	583.5918398
F1	1	8	F0	356.9232368
F1	1	8	F0	158.0566449
F1	1	1	M0	480.975
F1	1	1	M0	594.268
F1	1	1	M0	527.662
F1	1	1	M0	546.466
F1	1	1	M0	552.604
F1	1	1	M0	528.044
F1	1	1	M0	527.507
F1	1	1	M0	602.09
F1	1	1	M0	430.039
F1	1	2	M0	567.3466699
F1	1	2	M0	547.8940571
F1	1	2	M0	309.9193849
F1	1	2	M0	266.4347755
F1	1	2	M0	471.2968267
F1	1	2	M0	441.334974
F1	1	2	M0	376.1706745
F1	1	3	M0	359.6523684
F1	1	3	M0	301.7494336
F1	1	3	M0	573.6608786
F1	1	3	M0	554.511583
F1	1	3	M0	306.3503523
F1	1	3	M0	608.4451837
F1	1	3	M0	567.6454734
F1	1	3	M0	684.4776681
F1	1	4	M0	528.7175742
F1	1	4	M0	503.6353989
F1	1	4	M0	449.11301
F1	1	4	M0	412.0268982
F1	1	4	M0	448.4737898
F1	1	4	M0	527.5009939
F1	1	4	M0	262.4029795
F1	1	4	M0	481.0967013
F1	1	4	M0	269.1983025
F1	1	5	M0	516.3261248
F1	1	5	M0	482.9126445
F1	1	5	M0	483.8247956
F1	1	5	M0	404.1584293
F1	1	5	M0	396.07524
F1	1	5	M0	438.1769078
F1	1	5	M0	383.753961
F1	1	6	M0	256.9446583
F1	1	6	M0	446.0311125
F1	1	6	M0	361.7009978
F1	1	6	M0	397.1282208
F1	1	6	M0	398.6106763
F1	1	6	M0	388.5509214
F1	1	6	M0	431.1884187
F1	1	6	M0	457.2393994
F1	1	7	M0	570.009899
F1	1	7	M0	570.2224269
F1	1	7	M0	460.0801158
F1	1	7	M0	486.0654604
F1	1	7	M0	484.8980825
F1	1	7	M0	578.0981604
F1	1	7	M0	366.2882139
F1	1	8	M0	484.6405511
F1	1	8	M0	600.4321854
F1	1	8	M0	680.6304014
F1	1	8	M0	713.6948466
F1	1	8	M0	632.6383378
F1	1	8	M0	673.527576
F1	1	8	M0	474.3271262
F1	1	8	M0	695.8696204
